# Supplementary material
Source: Research Square preprint supplement (doi:10.21203/rs.3.rs-8856724/v1)
Supplement: Supplementary file 1 [file ead54e1919e7c729dae57979.docx]

Supplementary files

Title:

Carbon cloth electrode for electrochemical synthesis of ammonia from nitrogen and water without any catalyst under ambient temperature and pressure

Author:

Seiji Tanahashi1, Kaku Uehara2,3*, and Masakazu Tanahashi1

1Tanah Process Ltd.: 541-0045 Dosho-machi 1-2-11, Chuoh-ku, Osaka City, Japan

[tanahashi.seiji@tanap.jp](mailto:tanahashi.seiji@tanap.jp), [tanahashi.masakazu@tanap.jp](mailto:tanahashi.masakazu@tanap.jp)

2Uehara Research Institute of Advanced Science and Technology: 590-0134 Miikedai 4-19-2, Minami-ku, Sakai, Osaka, Japan

[kaku_uehara@yahoo.co.jp](mailto:kaku_uehara@yahoo.co.jp)

3Emeritus Professor of Osaka Prefecture University

*Author for correspondence


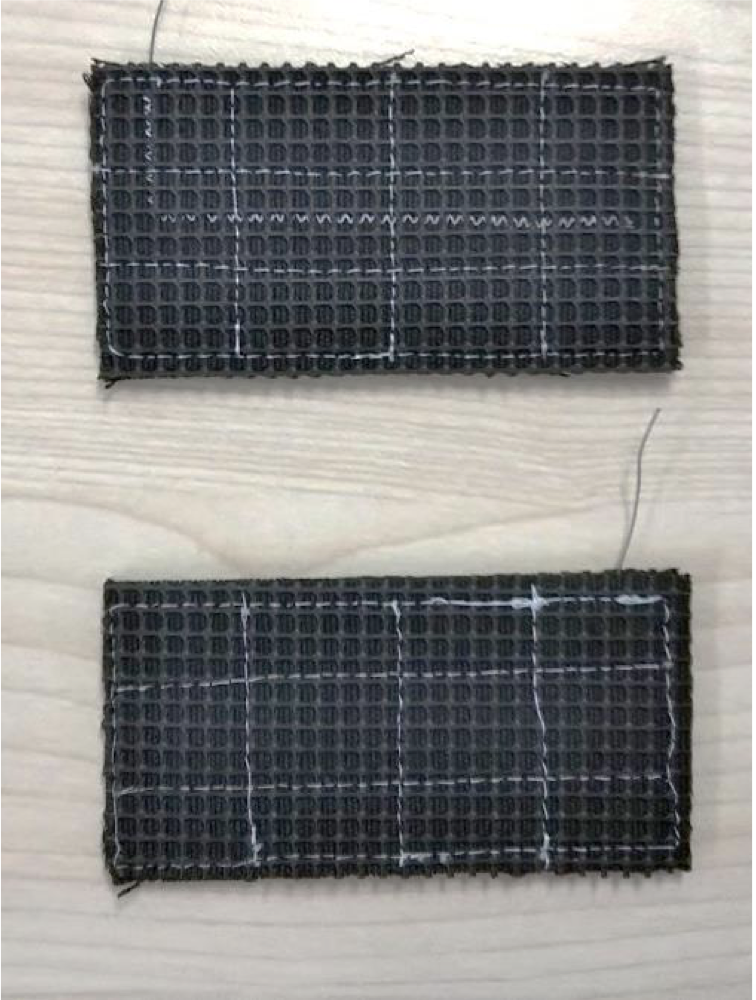


Figure S1 High surface area porous activated carbon cloth electrode.


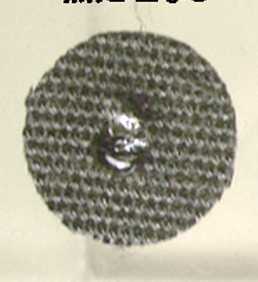

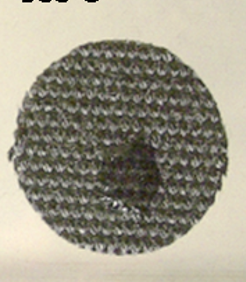


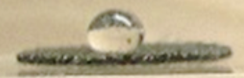

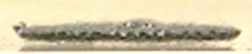


Before After (900℃)

Figure S2 Before and after heat treatment of carbon cloth.


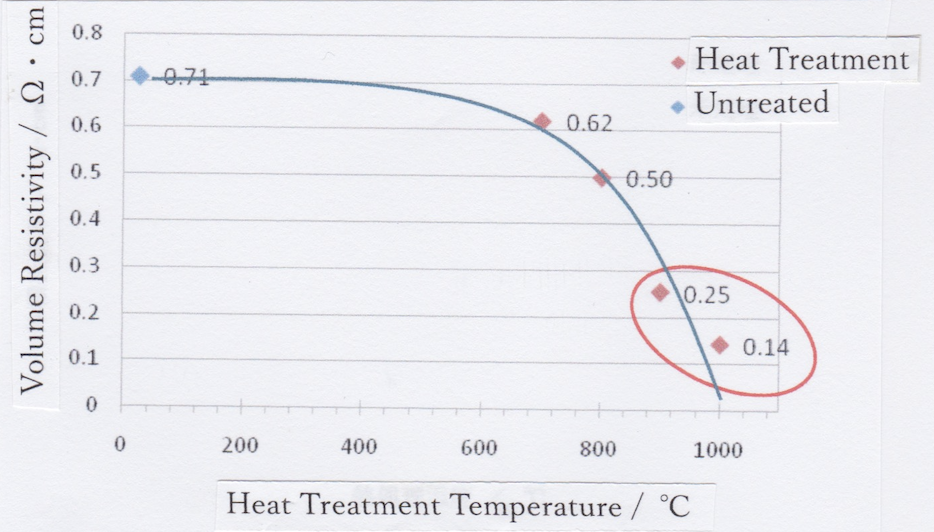


　　Figure S3 Volume resistivity of the high surface area porous activated carbon cloth before and after heat treatment at various temperature.

Table S1 The raw data of Figure 2

|  | pH=0 | pH=2 | pH=4 |
| --- | --- | --- | --- |
| **blue dashed line** | 0.10 volt | 0.10 volt | 0.10 volt |
| **red dashed line** | -0.14 volt | -0.14 volt | -0.14 volt |

Table S2 The raw data of Figure 3

| volt | -3.53 | -3.04 | -2.84 | -1.50 | 2.84 | 3.04 | 3.53 |
| --- | --- | --- | --- | --- | --- | --- | --- |
| NH3mmol | 2.7 | 2.1 | 1.2 | 0.05 | - | - | - |
| H2 ppm | 0.05 | 0.02 | 0 | 0 | - | - | - |
| O2 ppm | - | - | - | - | 0 | 0.01 | 0.025 |

Table S3 The raw data of Figure S3

| HeatTemper  ature ℃ | 25 | 700 | 800 | 900 | 1000 |
| --- | --- | --- | --- | --- | --- |
| VolumeResis  tivity Ωcm | 0.71 | 0.62 | 0.50 | 0.25 | 0.14 |
